# Supplementary material for: Electrochemical oxidative dehydrogenation of propane to propylene in an oxygen-ion conducting solid oxide electrolyzer
Source: Royal Society of Chemistry journal article supplement (doi:10.1039/d4ta06022a), 2024-01-01
Supplement: d4ta06022a1.pdf [file d4ta06022a1.pdf]

## Supplementary Information

### Electrochemical Oxidative Dehydrogenation of Propane to Propylene in an Oxygen-ion Conducting Solid Oxide Electrolyzer

Cong Luo<sup>abd</sup>, Jiaming Ma<sup>bd</sup>, Lingting Ye<sup>\*bd</sup> and Kui Xie<sup>\*bcd</sup>

---

<sup>a</sup>. C. Luo, College of Physics and Energy, Fujian Normal University, Fuzhou 350117, China.

<sup>b</sup>. C. Luo, J.M. Ma, L.T. Ye, Prof. K. Xie, Key Laboratory of Design & Assembly of Functional Nanostructures, Fujian Institute of Research on the Structure of Matter, Chinese Academy of Sciences, Fuzhou, Fujian 350002, China. E-mail: [ltye@fjirsm.ac.cn](mailto:ltye@fjirsm.ac.cn)

<sup>c</sup>. Prof. K. Xie, School of Mechanical Engineering, Shanghai Jiao Tong University, 800 Dongchuan Road, Shanghai 200240, China. E-mail: [xiekui@sjtu.edu.cn](mailto:xiekui@sjtu.edu.cn)

<sup>d</sup>. C. Luo, J.M. Ma, L.T. Ye, Prof. K. Xie, Fujian College, University of Chinese Academy of Sciences, Fuzhou, Fujian 350002, China

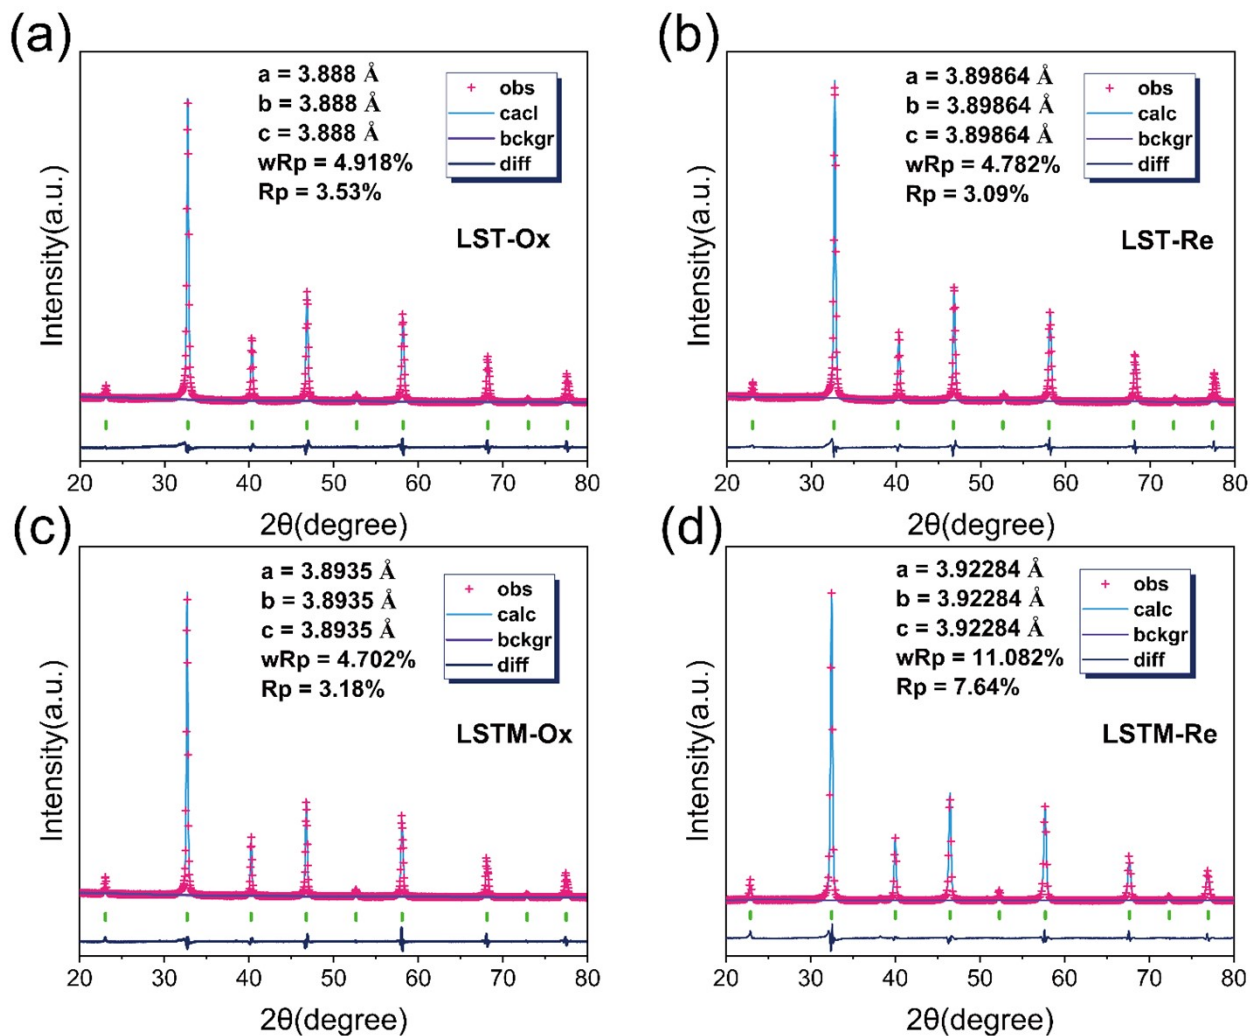

**Fig. S1** XRD Rietveld refinement patterns of (a) oxidized and (b) reduced LST; (c) oxidized and (d) reduced LSTM.

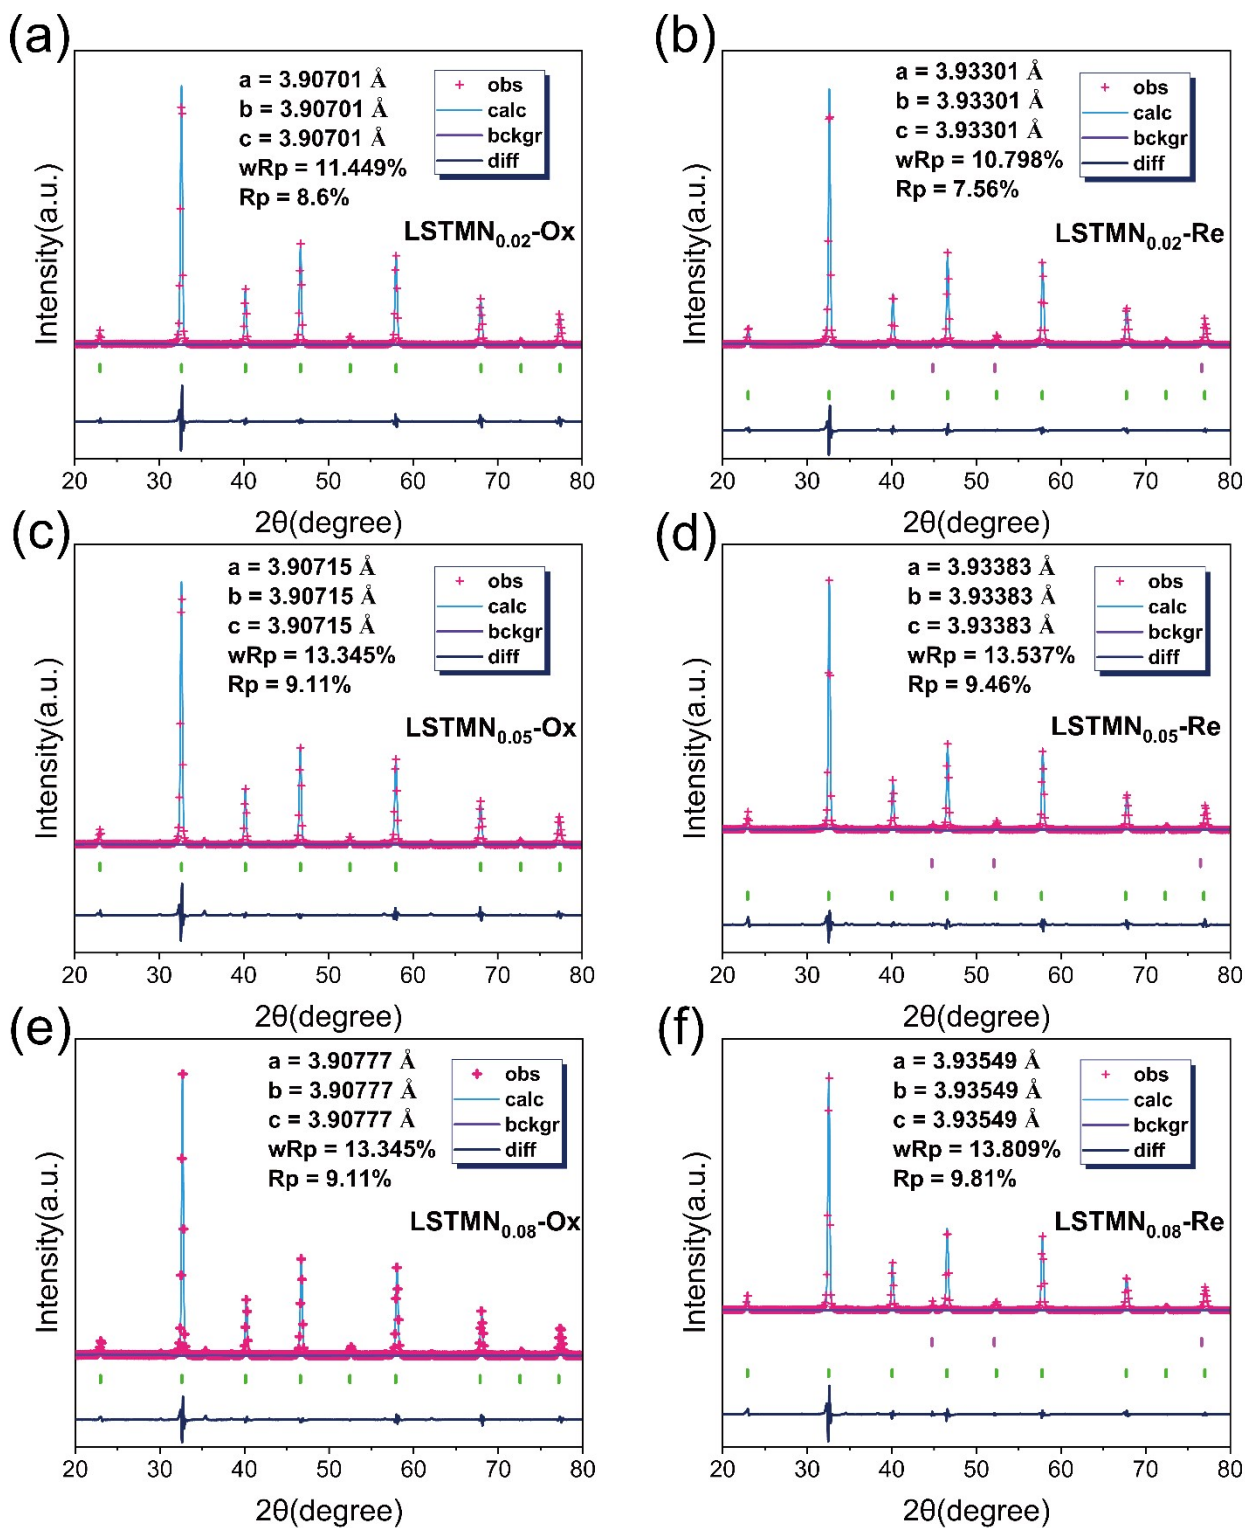

**Fig. S2** XRD rietveld refinement patterns of the (a) oxidized and (b) reduced LSTMN<sub>0.02</sub>; (c) oxidized and (d) reduced LSTMN<sub>0.05</sub>; (e) oxidized and (f) reduced LSTMN<sub>0.08</sub>.

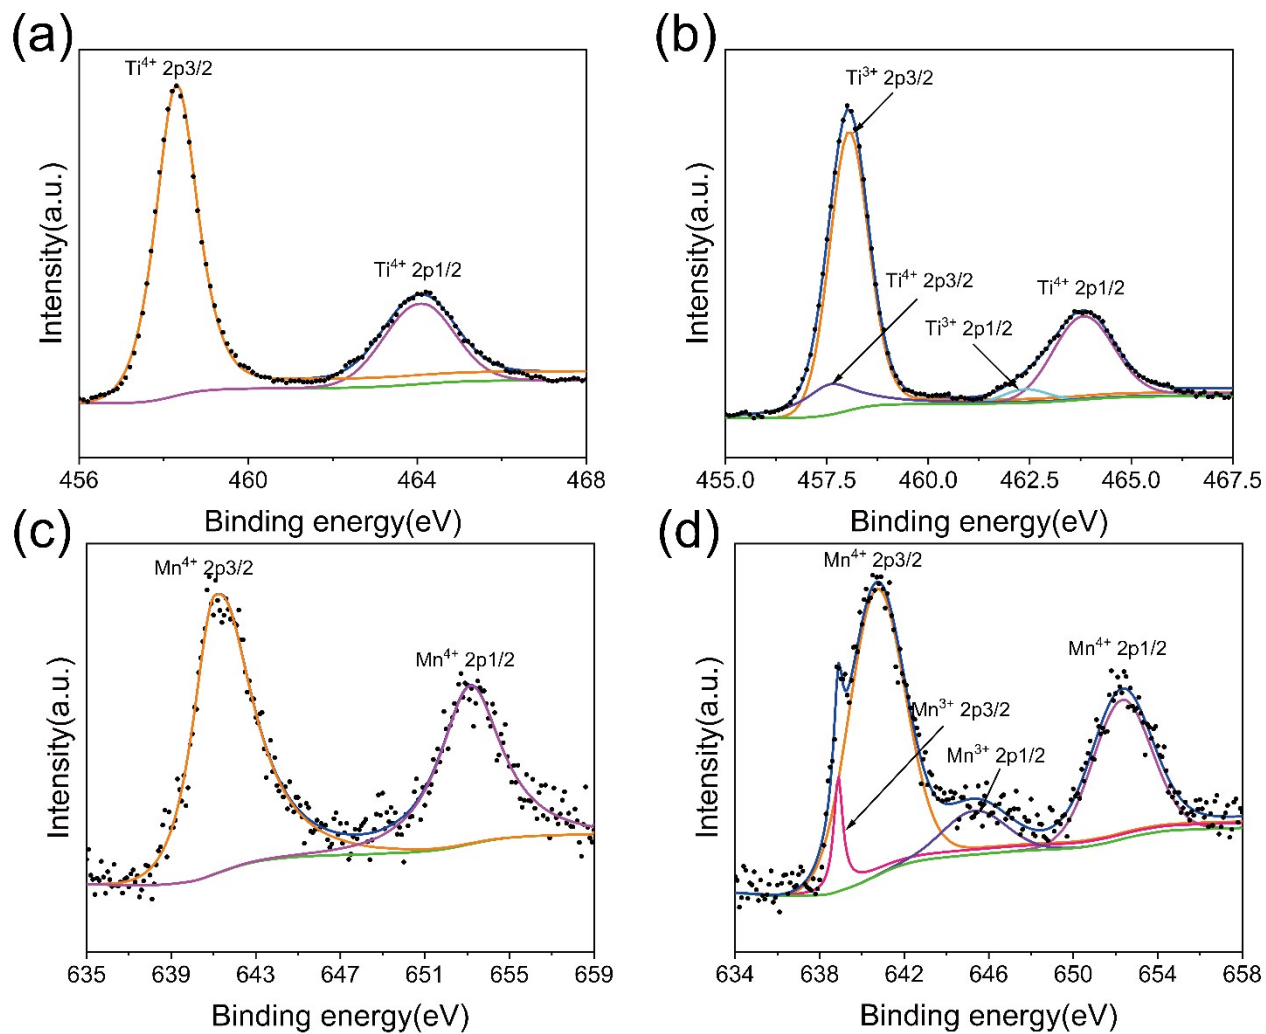

**Fig. S3** XPS results of Ti and Mn in the (a, c) oxidized and (b, d) reduced LSTM, respectively.

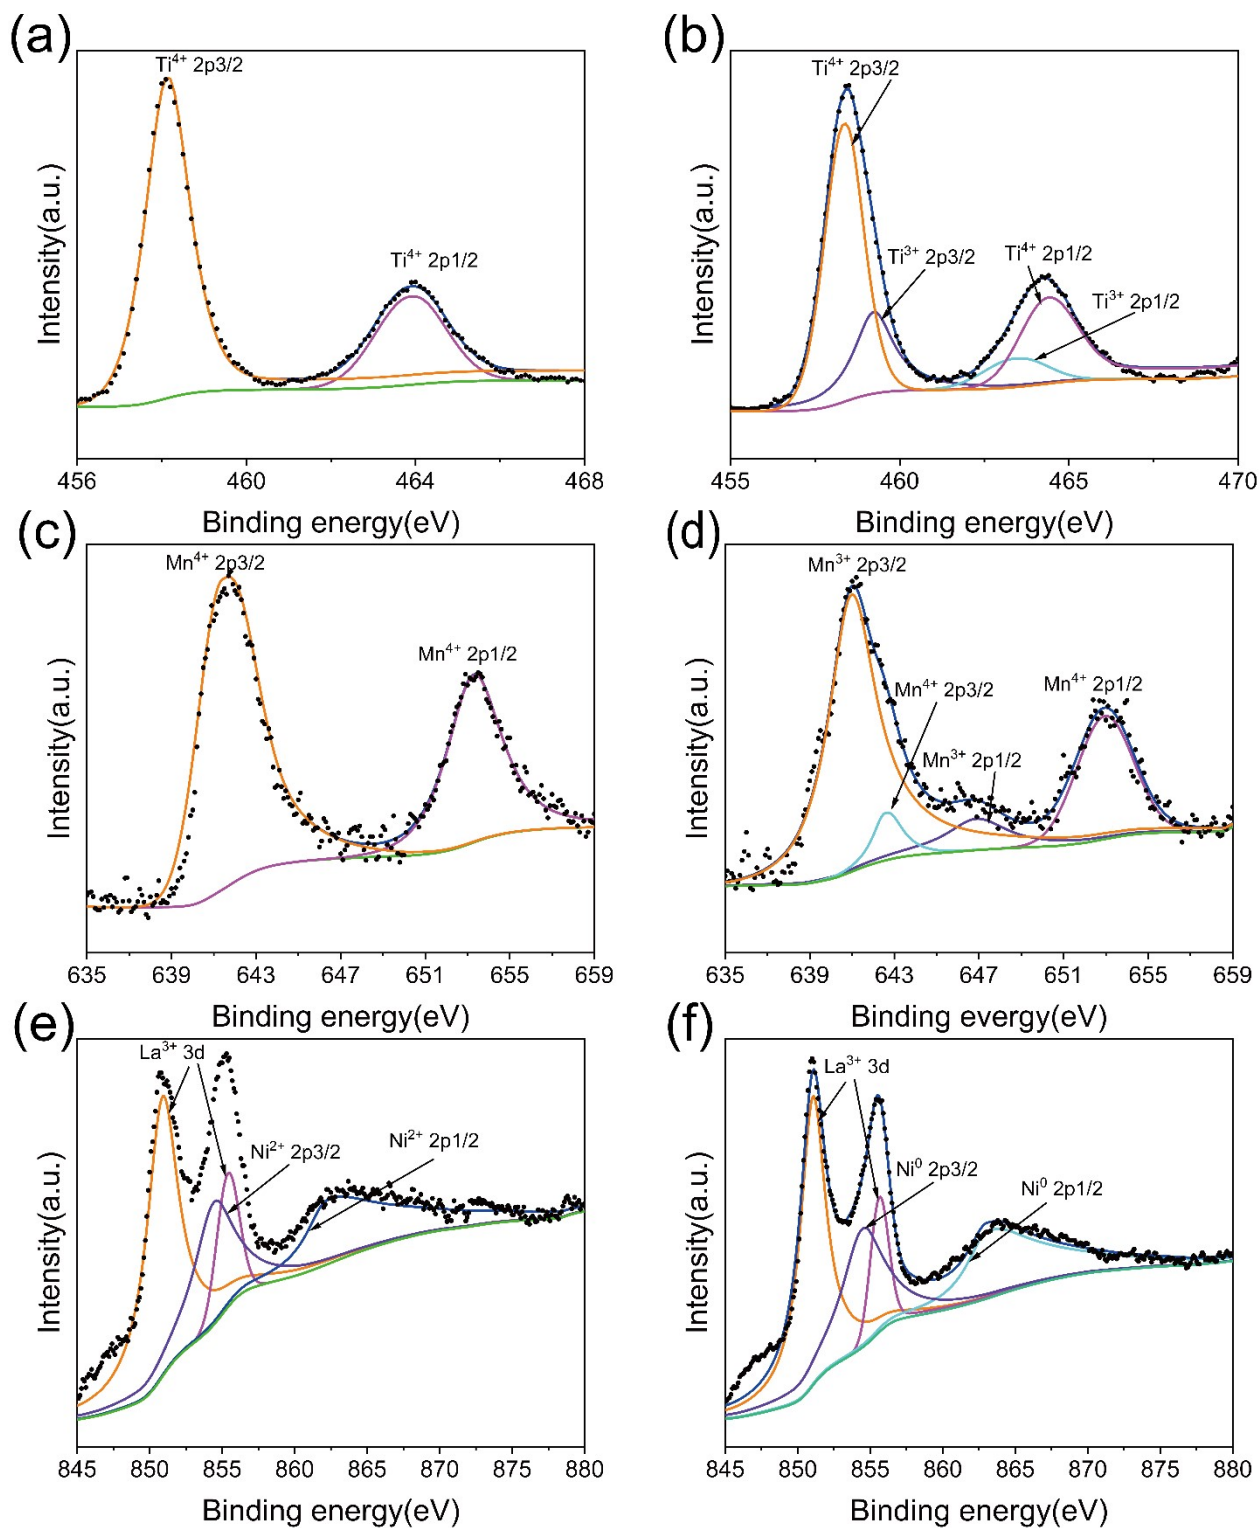

Fig. S4 XPS results of Ti, Mn, and Ni in the (a, c, e) oxidized and (b, d, f) reduced LSTMN<sub>0.1</sub>, respectively.

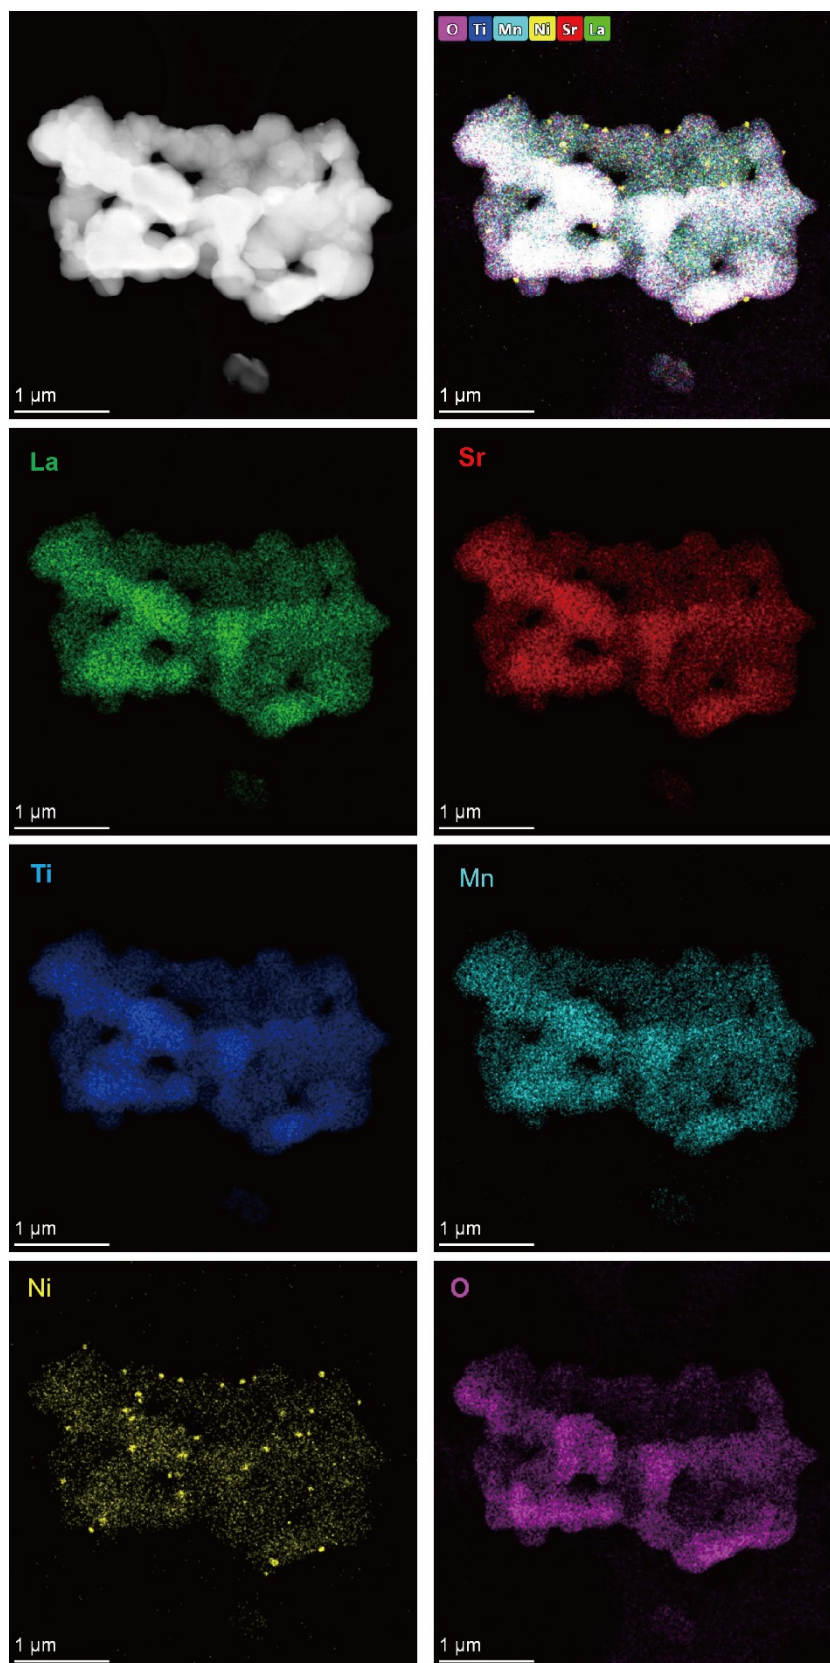

Fig. S5 HRTEM result of the mapping after LSTMN<sub>0.1</sub> reduction.

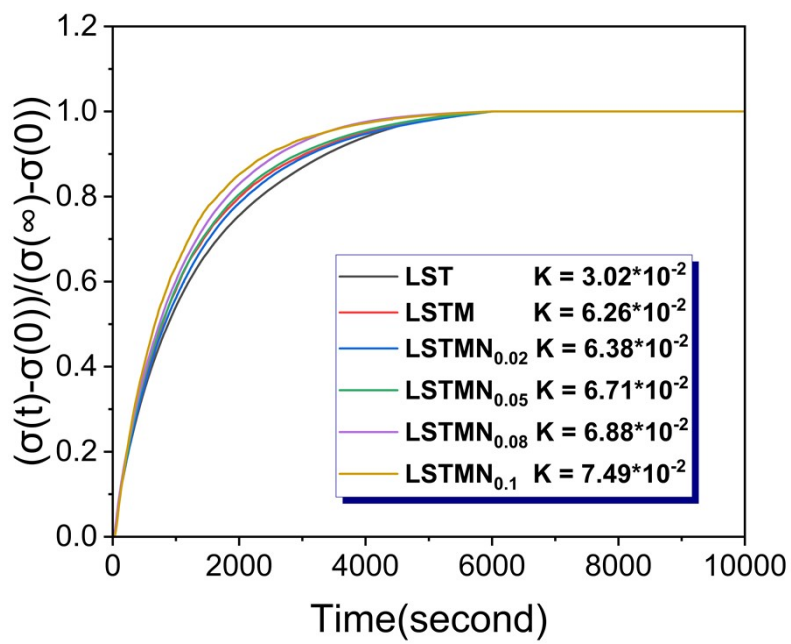

**Fig. S6** Surface oxygen exchange coefficients of different electrode materials.

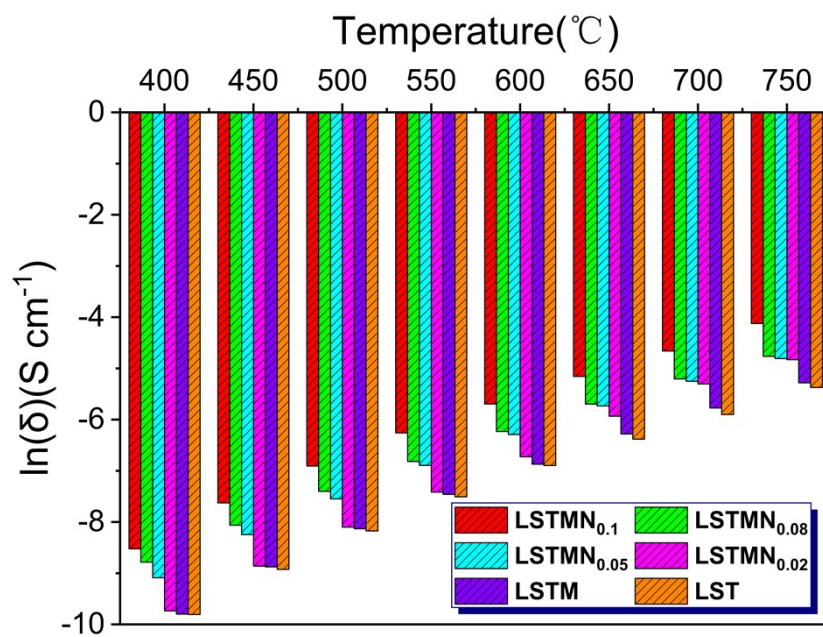

Fig. S7 The conductivity of different electrode materials in 5% H<sub>2</sub>/Ar atmosphere.



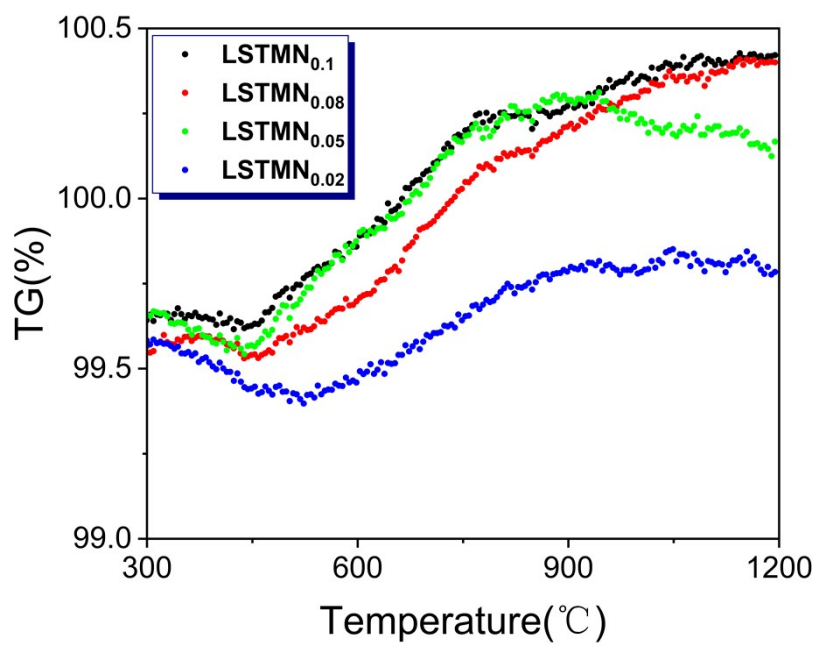

**Fig. S8** TG tests of the reduced Ni-doped samples from 300 to 1200 °C in air.

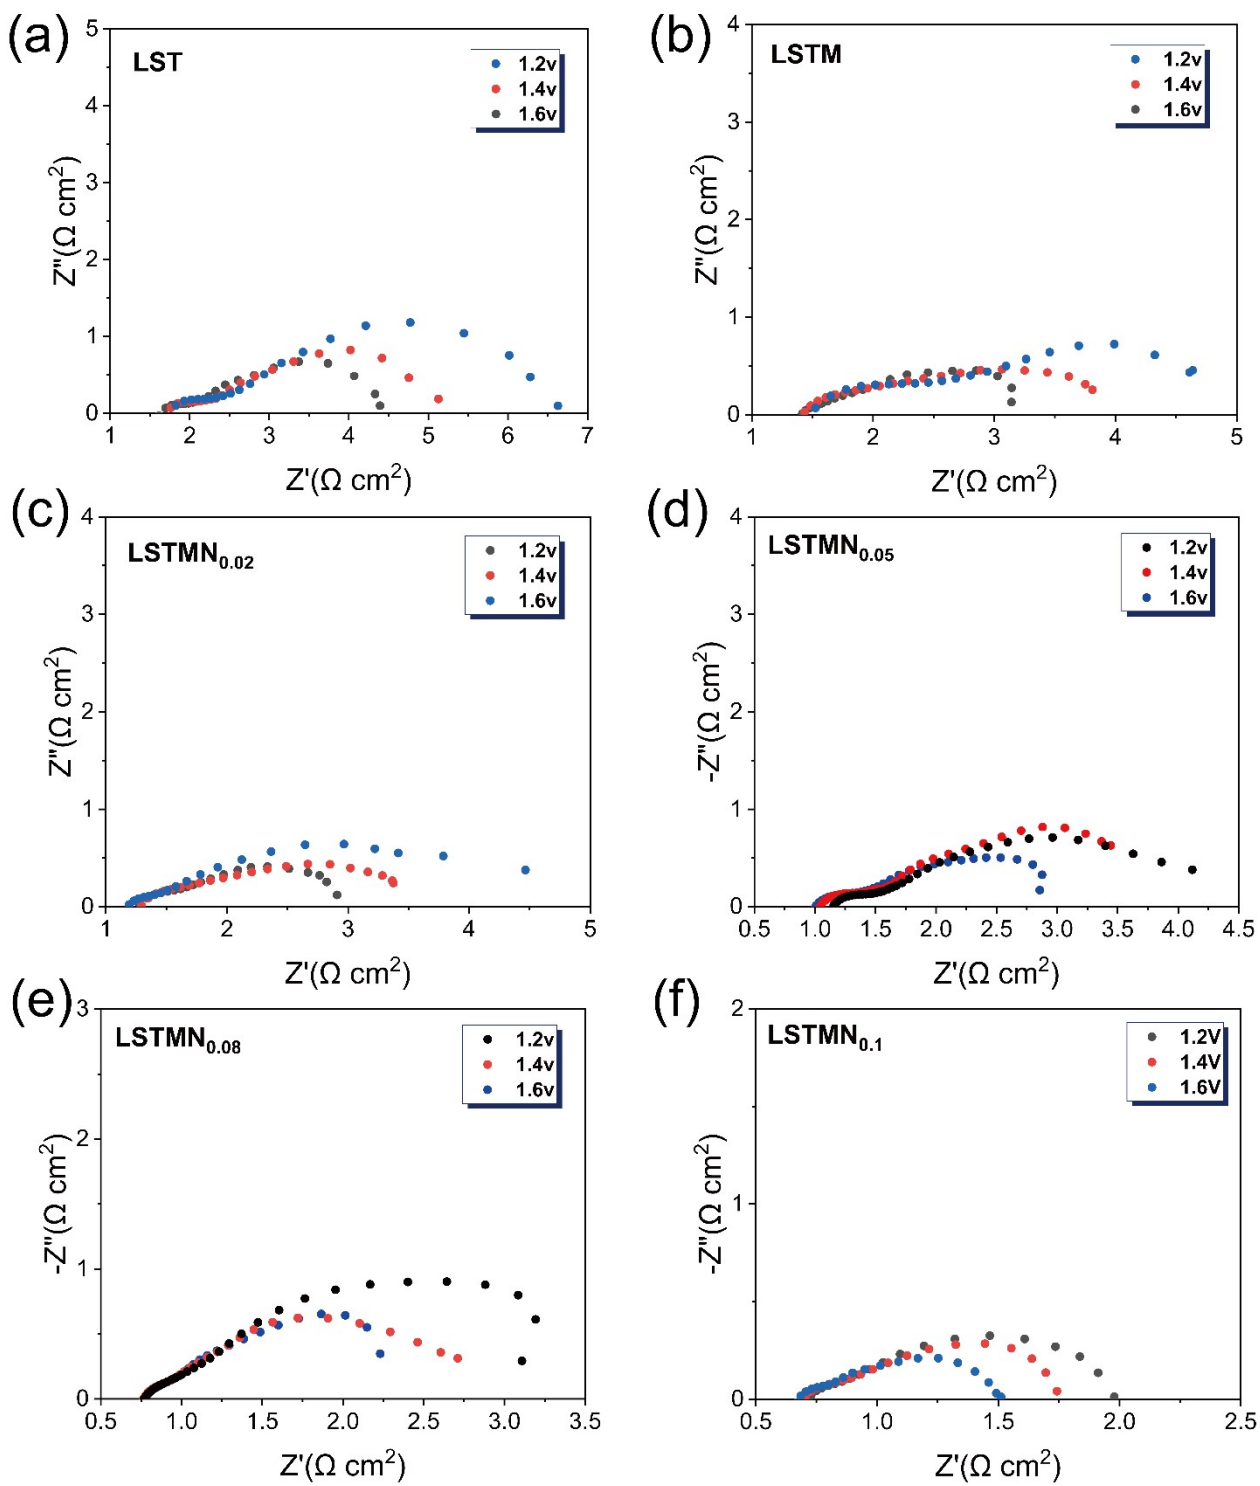

**Fig. S9** AC impedance spectra of (a) LST, (b) LSTM, (c) LSTMN<sub>0.02</sub>, (d) LSTMN<sub>0.05</sub>, (e) LSTMN<sub>0.08</sub>, (f) LSTMN<sub>0.1</sub>.

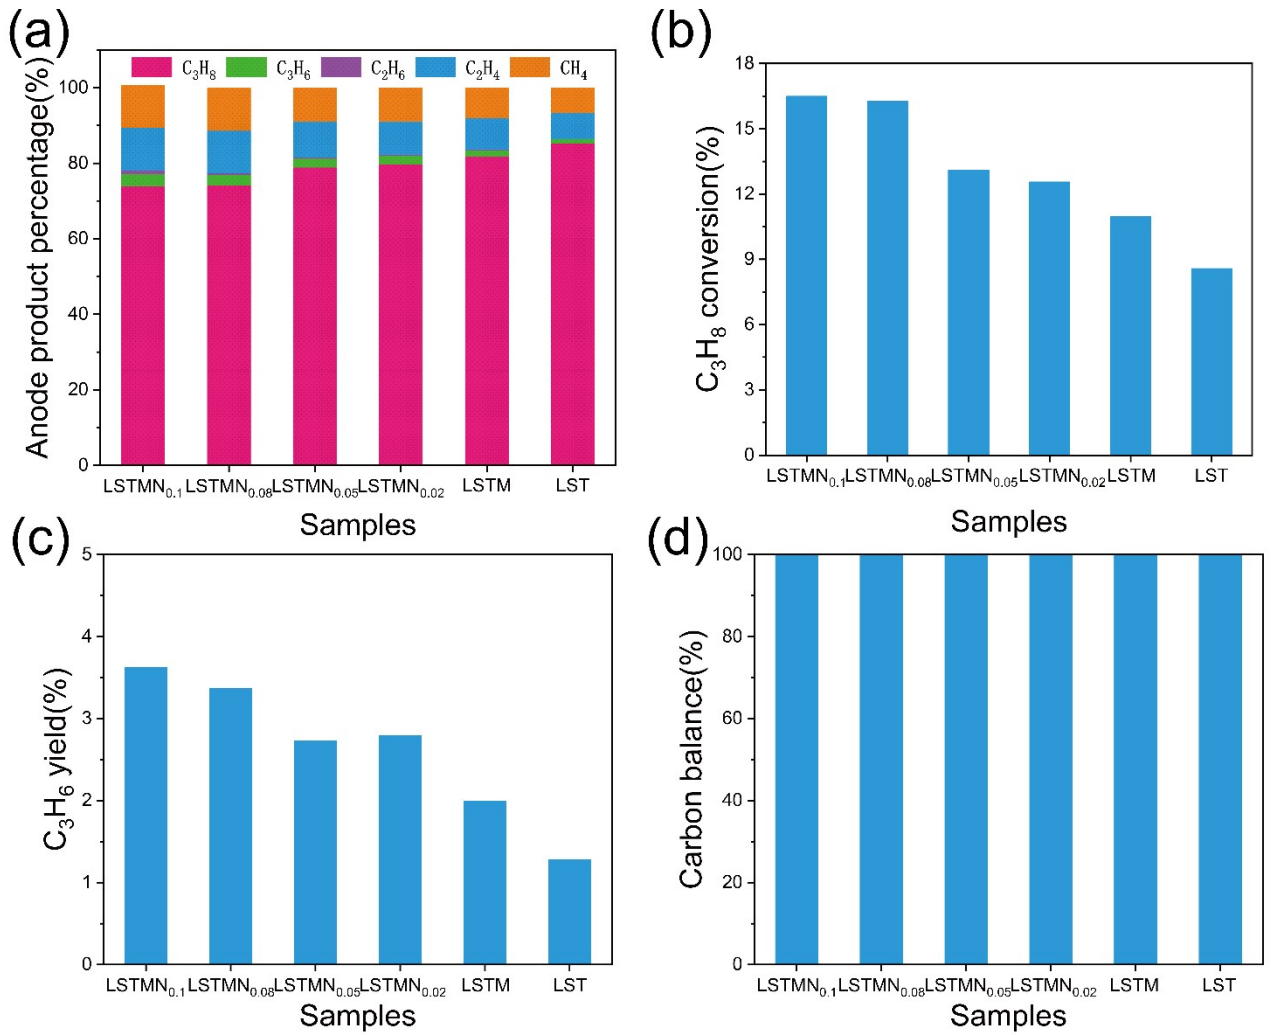

**Fig. S10** (a) Analysis of the products of thermal decomposition of propane in the anode of a solid oxide electrolyzer without externally applied voltage at 700 °C. (b) Propane conversion. (c) Propylene yield. (d) Carbon balance.

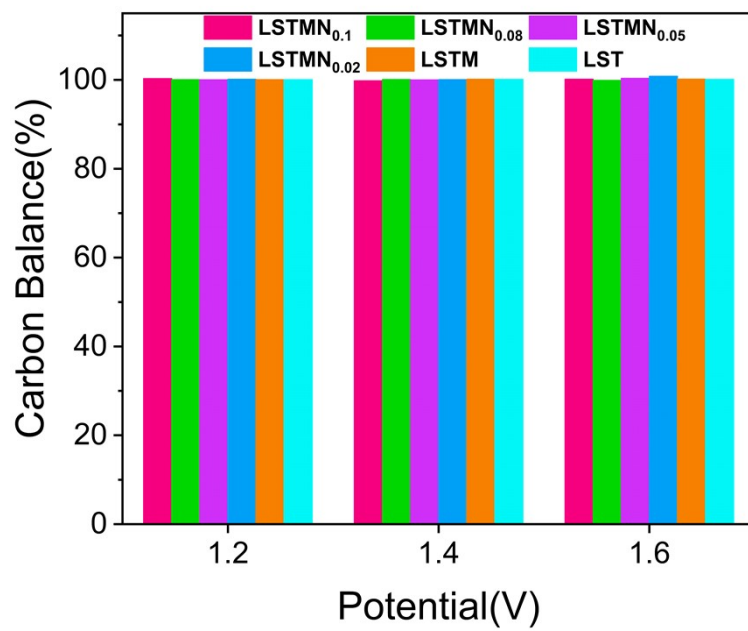

**Fig. S11** Carbon balance of propane dehydrogenation for different electrode materials.

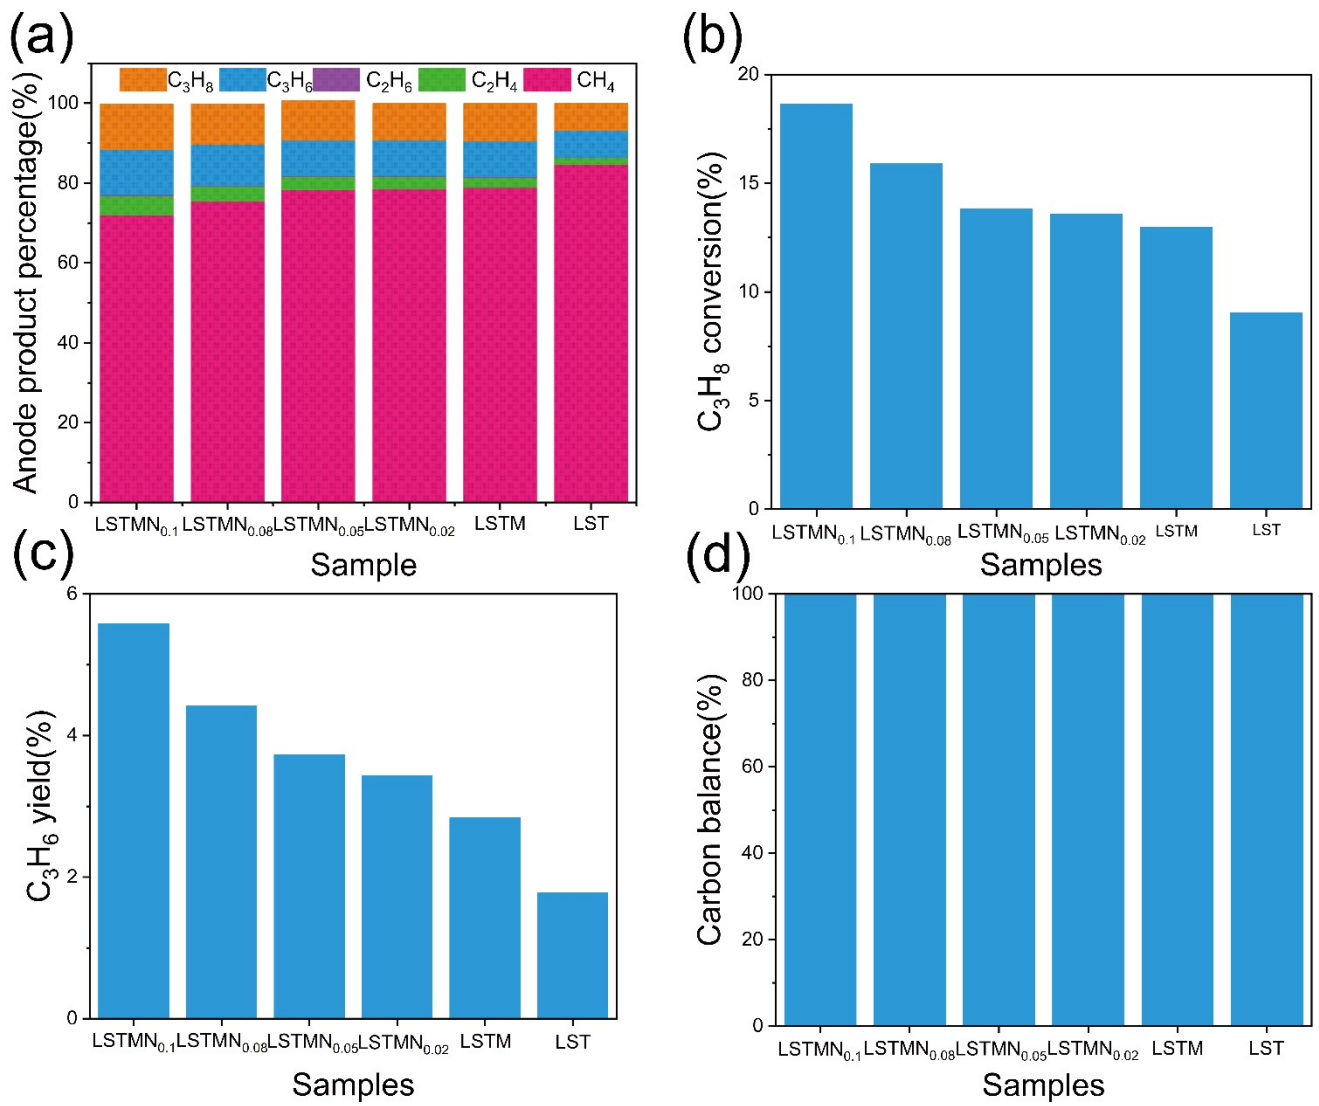

**Fig. S12** (a) Analysis of the products of thermal decomposition of propane in the anode of a solid oxide electrolyzer at 700°C without applied voltage and with the addition of water vapor. (b) Propane conversion. (c) Propylene yield. (d) Carbon balance.

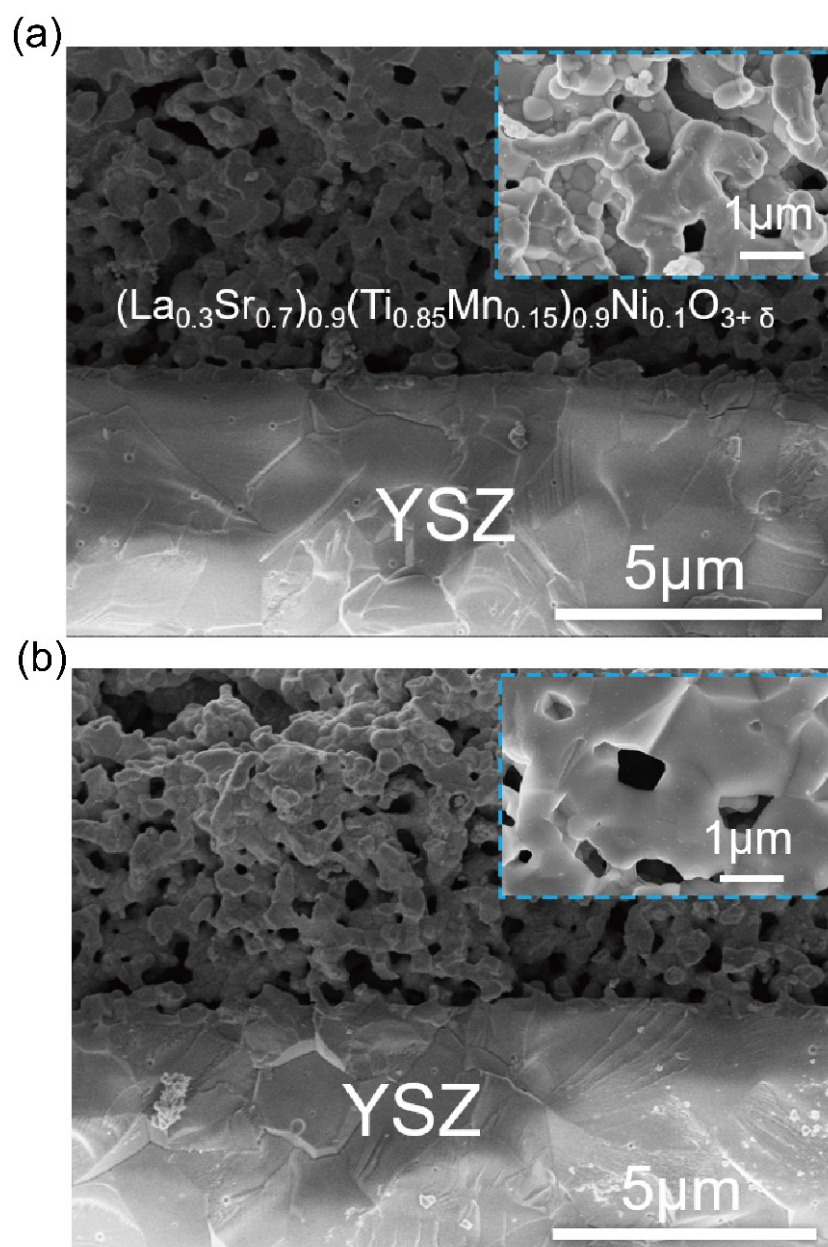

**Fig. S13** (a) SEM image of the cell interface before the reaction. (b) SEM image of the cell interface after the reaction.

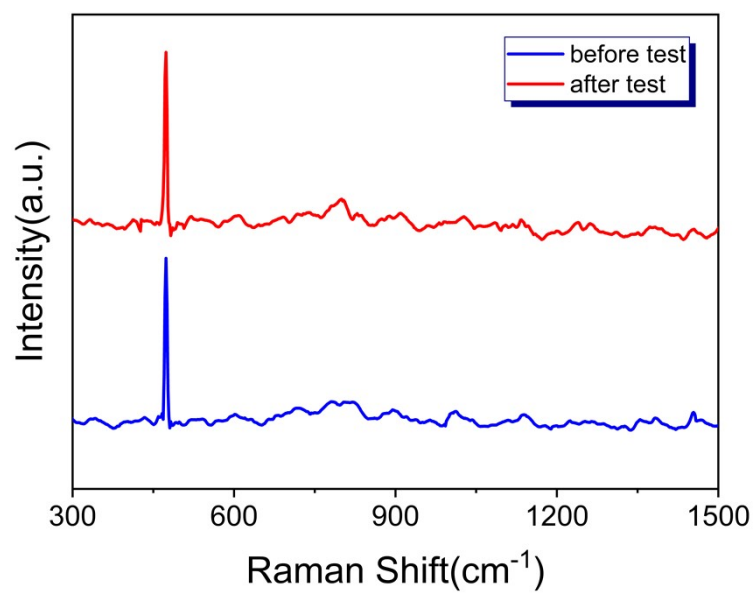

**Fig. S14** Raman spectra are measured before and after the test.
